# Supplementary material
Source: publisher figshare collection journal article supplement (https://acs.figshare.com/ndownloader/files/26711386)
Supplement: Supplementary file 1 [file 26711386]

# Supporting Information

## Phase Identification and Ordered Vacancy Imaging in Epitaxial Metallic Ta<sub>2</sub>N Thin Films

*Andrew C. Lang<sup>1\*</sup>, D. Scott Katzer<sup>2</sup>, Neeraj Nepal<sup>2</sup>, David J Meyer<sup>2</sup>, Rhonda M. Stroud<sup>3</sup>*

1. American Society for Engineering Education Postdoctoral Fellow, U.S. Naval Research Laboratory, Washington, DC 20375 USA
2. Electronics Science and Technology Division, U.S. Naval Research Laboratory, Washington, DC 20375 USA
3. Materials Science and Technology Division, U.S. Naval Research Laboratory, Washington, DC 20375 USA

\*Corresponding Author: [andrew.lang.ctr@nrl.navy.mil](mailto:andrew.lang.ctr@nrl.navy.mil)

**Table S1.** Rutherford Backscattering Spectrometry of TaN<sub>x</sub> grown on SiC

|                       | Atomic Concentrations [at%] |    |      |    |      |
|-----------------------|-----------------------------|----|------|----|------|
|                       | Si                          | Nb | N    | C  | Ta   |
| TaN <sub>x</sub> Film | -                           | 1  | 38.4 | -  | 60.6 |
| SiC Substrate         | 50                          | -  | -    | 50 | -    |

The estimated uncertainties from RBS are as follows, Ta  $\pm 1$  at%, Nb  $\pm 0.5$  at%, Si  $\pm 1$  at%, N  $\pm 4\%$ , C  $\pm 5$  at%.

**Table S2.** EDS of TaN<sub>x</sub> grown on SiC

|                       | Atomic Concentrations [at%] |    |                 |   |                  |
|-----------------------|-----------------------------|----|-----------------|---|------------------|
|                       | Si                          | Nb | N               | C | Ta               |
| TaN <sub>x</sub> Film | -                           | -  | 37.1 $\pm$ 2.1% | - | 62.9 $\pm$ 2.44% |

STEM-EDS was acquired off zone axis to avoid channeling, the acquisition was done across a large area of the entire film. The composition was determined by summing the signal over the entire film area. The sample was tilted towards the EDS detector in order to optimize the collection of x-rays and lower system peaks.

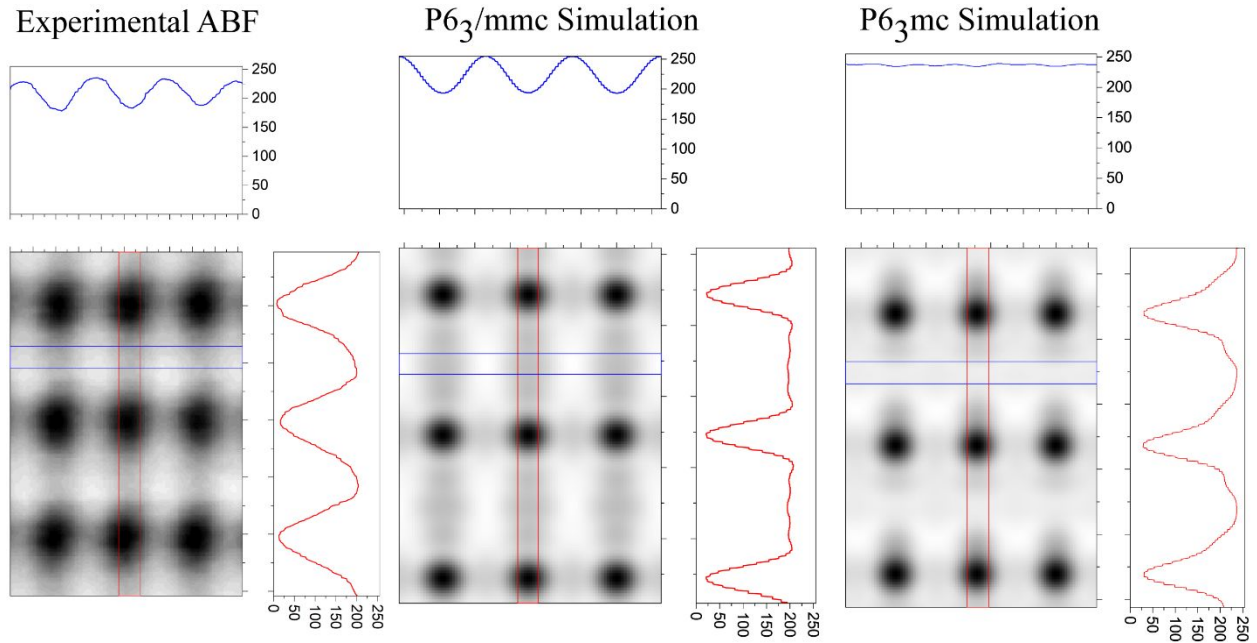

**Figure S1.** Extracted line profiles from the experimental and simulated ABF images shown in Figure 3. Specifically the blue line profile, which is centered about the N-sublattice position in the P6<sub>3</sub>/mmc structure, confirms the presence of the N-sublattice in the experimental ABF image. The line plots created for the experimental ABF image are displayed as normalized to 8-bit for comparison to simulation but no data processing was done to compress the raw data.
